# Supplementary material
Source: PubMed Central journal article supplement (PMC4140188)

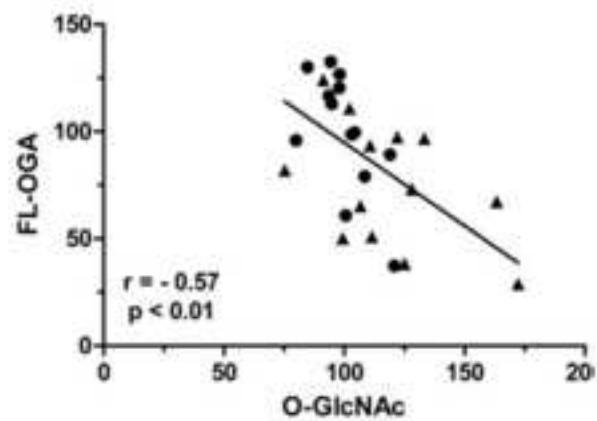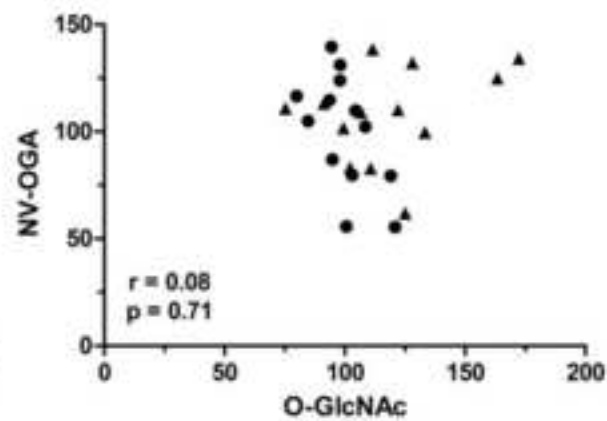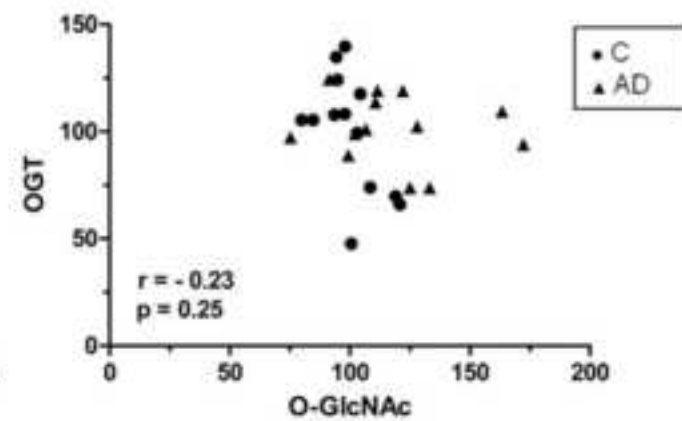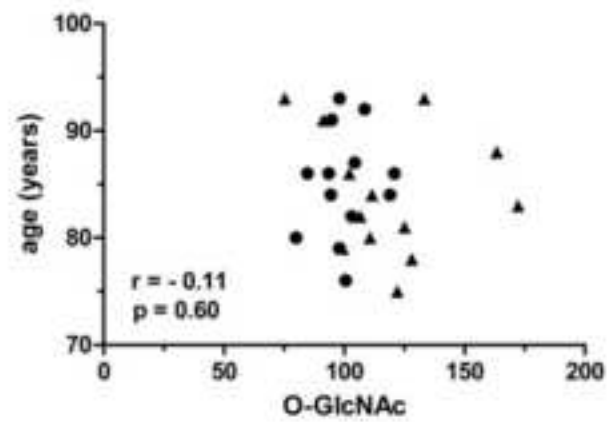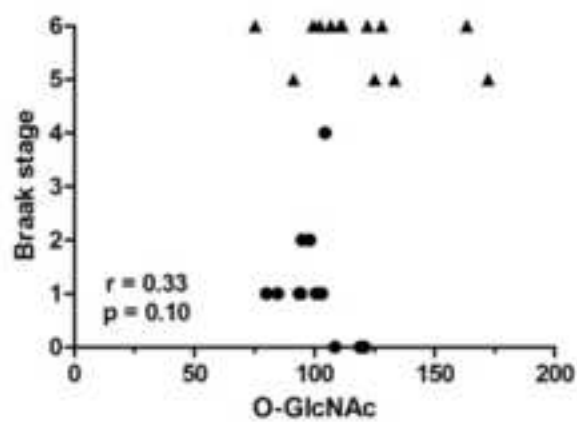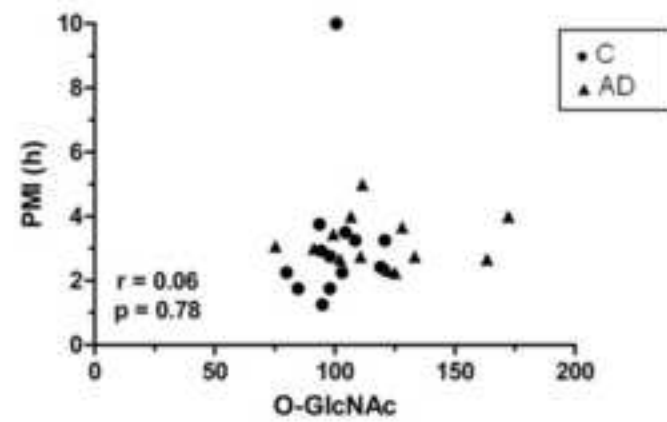

| <b>Sample</b> | <b>O-GlcNAc<br/>(%control)</b> | <b>FL-OGA<br/>(%control)</b> | <b>NV-OGA<br/>(%control)</b> | <b>OGT<br/>(%control)</b> | <b>Age<br/>(years)</b> | <b>Braak<br/>stage</b> | <b>PMI<br/>(h)</b> |
|---------------|--------------------------------|------------------------------|------------------------------|---------------------------|------------------------|------------------------|--------------------|
| C             | 104.37                         | 99.53                        | 109.87                       | 117.55                    | 87                     | IV                     | 3.50               |
| C             | 103.04                         | 98.63                        | 79.64                        | 99.37                     | 82                     | I                      | 2.25               |
| C             | 93.60                          | 116.74                       | 114.70                       | 107.84                    | 86                     | I                      | 3.75               |
| C             | 79.97                          | 95.95                        | 116.54                       | 105.46                    | 80                     | I                      | 2.25               |
| C             | 119.01                         | 89.15                        | 79.25                        | 69.79                     | 84                     | 0                      | 2.42               |
| C             | 100.63                         | 60.85                        | 55.74                        | 47.74                     | 76                     | I                      | 10.00              |
| C             | 98.04                          | 126.69                       | 131.09                       | 139.71                    | 93                     | II                     | 2.75               |
| C             | 97.99                          | 120.42                       | 123.93                       | 108.22                    | 79                     | II                     | 1.75               |
| C             | 108.45                         | 79.12                        | 102.30                       | 73.99                     | 92                     | 0                      | 3.25               |
| C             | 94.89                          | 112.92                       | 86.93                        | 124.21                    | 91                     | II                     | 1.25               |
| C             | 84.74                          | 130.10                       | 104.99                       | 105.47                    | 86                     | I                      | 1.75               |
| C             | 120.87                         | 37.36                        | 55.43                        | 65.89                     | 86                     | 0                      | 3.25               |
| C             | 94.39                          | 132.54                       | 139.58                       | 134.76                    | 84                     | I                      | 2.93               |
| AD            | 163.42                         | 67.34                        | 124.91                       | 109.39                    | 88                     | VI                     | 2.67               |
| AD            | 102.17                         | 110.82                       | 83.17                        | 99.12                     | 86                     | VI                     | 2.67               |
| AD            | 111.55                         | 50.98                        | 138.38                       | 119.23                    | 84                     | VI                     | 5.00               |
| AD            | 91.29                          | 124.16                       | 113.22                       | 124.46                    | 91                     | V                      | 3.00               |
| AD            | 133.25                         | 96.79                        | 99.69                        | 73.77                     | 93                     | V                      | 2.75               |
| AD            | 172.32                         | 28.97                        | 134.25                       | 94.05                     | 83                     | V                      | 4.00               |
| AD            | 122.05                         | 97.43                        | 110.18                       | 119.09                    | 75                     | VI                     | 2.33               |
| AD            | 128.07                         | 73.19                        | 132.21                       | 102.39                    | 78                     | VI                     | 3.67               |
| AD            | 106.77                         | 65.30                        | 108.91                       | 101.02                    | 82                     | VI                     | 4.00               |
| AD            | 75.31                          | 81.97                        | 110.76                       | 97.33                     | 93                     | VI                     | 3.08               |
| AD            | 125.03                         | 38.36                        | 61.99                        | 73.77                     | 81                     | V                      | 2.25               |
| AD            | 99.34                          | 50.22                        | 101.72                       | 88.91                     | 79                     | VI                     | 3.45               |
| AD            | 110.77                         | 93.46                        | 82.79                        | 113.74                    | 80                     | VI                     | 2.75               |

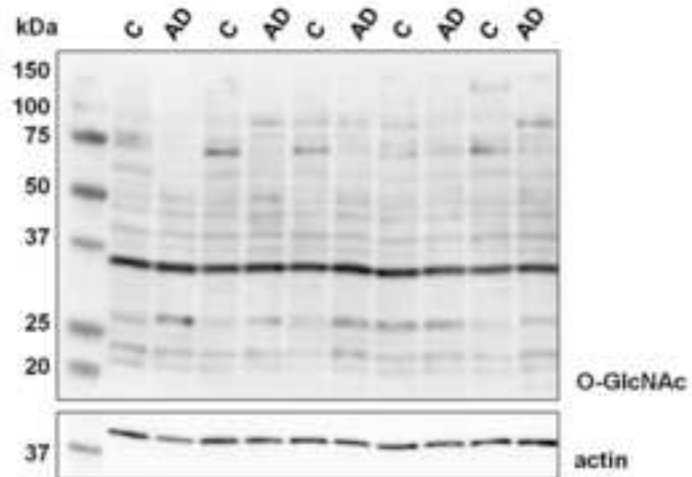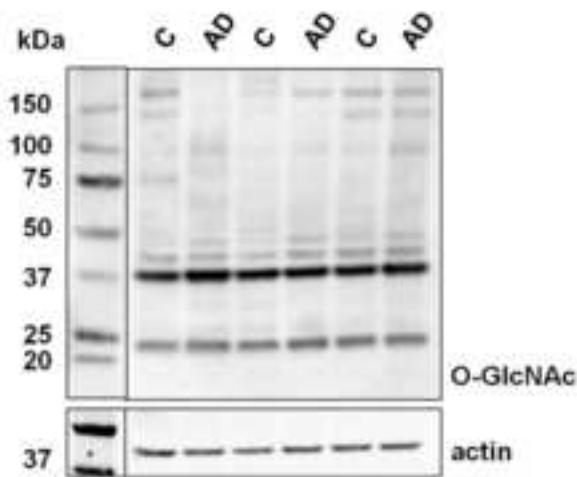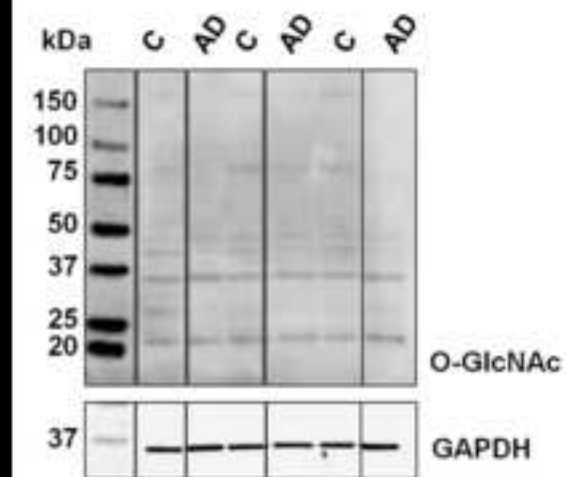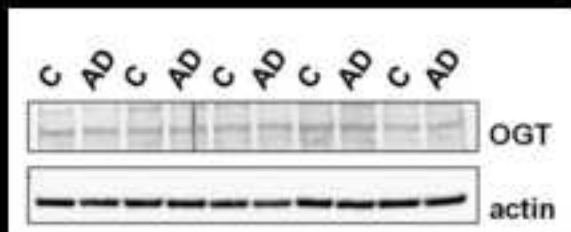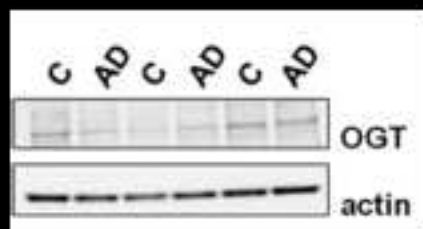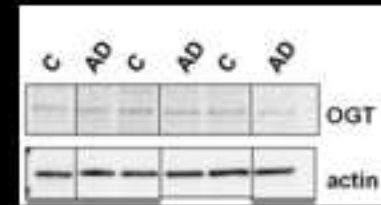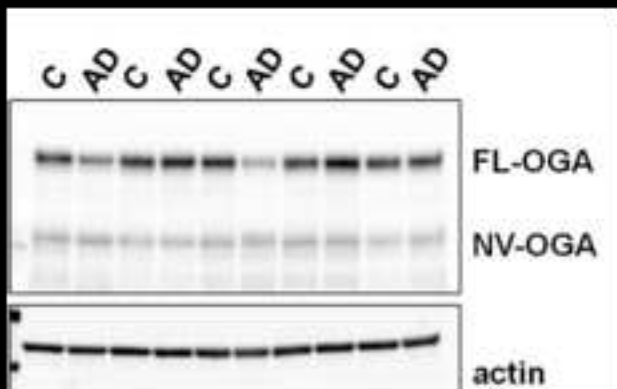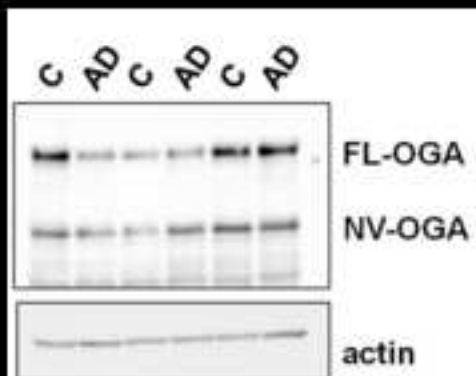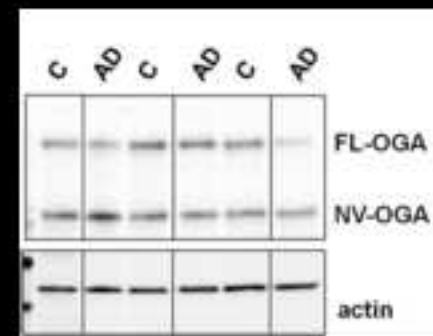

Supplement: NIHMS611231-supplement-01.pdf [file NIHMS611231-supplement-01.pdf]
